# Supplementary material for: CD105 overexpression mediates drug-resistance in choriocarcinoma cells through BMP9/Smad pathway
Source: PubMed Central journal article supplement (PMC6930438; doi:10.7150/jca.34965), 2020-01-01
Supplement: jcav11p0272s1.pdf [file jcav11p0272s1.pdf]

**Supplementary Table****Table S1****Association of clinicopathological parameters and expression of CD105 in 33 patients with choriocarcinoma (Mann-Whitney U test).**

|                                  | Cytotrophoblasts |          | Intermediate trophoblasts |          | Syncytiotrophoblasts |          |
|----------------------------------|------------------|----------|---------------------------|----------|----------------------|----------|
|                                  | n                | <i>P</i> | n                         | <i>P</i> | n                    | <i>P</i> |
| Age                              |                  |          |                           |          |                      |          |
| ≤35                              | 19               | 0.912    | 22                        | 0.206    | 20                   | 0.977    |
| >35                              | 8                |          | 11                        |          | 7                    |          |
| Preoperative β-hCG (mIU/mL)      |                  |          |                           |          |                      |          |
| ≤5                               | 18               | 0.260    | 24                        | 0.977    | 17                   | 0.671    |
| >5                               | 9                |          | 9                         |          | 10                   |          |
| Preoperative chemotherapy cycles |                  |          |                           |          |                      |          |
| ≤4                               | 14               | 0.135    | 19                        | 0.343    | 13                   | 0.166    |
| >4                               | 13               |          | 14                        |          | 14                   |          |
| Relapse                          |                  |          |                           |          |                      |          |
| NO                               | 20               | 0.038    | 25                        | 0.068    | 21                   | 0.021    |
| YES                              | 7                |          | 8                         |          | 6                    |          |

**Table S2****Association of clinicopathological parameters and expression of BMP9 in 33 patients with choriocarcinoma (Mann-Whitney U test).**

|                                  | Cytotrophoblasts |          | Intermediate trophoblasts |          | Syncytiotrophoblasts |          |
|----------------------------------|------------------|----------|---------------------------|----------|----------------------|----------|
|                                  | n                | <i>P</i> | n                         | <i>P</i> | n                    | <i>P</i> |
| Age                              |                  |          |                           |          |                      |          |
| ≤35                              | 19               | 0.774    | 22                        | 0.373    | 20                   | 0.588    |
| >35                              | 8                |          | 11                        |          | 7                    |          |
| Preoperative β-hCG (mlu/mL)      |                  |          |                           |          |                      |          |
| ≤5                               | 18               | 0.176    | 24                        | 0.231    | 17                   | 0.141    |
| >5                               | 9                |          | 9                         |          | 10                   |          |
| Preoperative chemotherapy cycles |                  |          |                           |          |                      |          |
| ≤4                               | 14               | 0.790    | 19                        | 0.527    | 13                   | 0.728    |
| >4                               | 13               |          | 14                        |          | 14                   |          |
| Relapse                          |                  |          |                           |          |                      |          |
| NO                               | 20               | 0.045    | 25                        | 0.037    | 21                   | 0.002    |
| YES                              | 7                |          | 8                         |          | 6                    |          |

**Table S3****Correlation between CD105 and BMP9 expression (Spearman test).**

| Cell type                 | <i>r</i> | <i>P</i> |
|---------------------------|----------|----------|
| Cytotrophoblasts          | 0.461    | 0.018    |
| Intermediate trophoblasts | 0.046    | 0.801    |
| Syncytiotrophoblasts      | 0.531    | 0.004    |

### **Supplementary Figure legend**

Supplementary Fig. (A) Cell viability by a CCK8 assay after treating with increasing concentrations of BMP9 in JEG-3/CD105 OE and JEG-3/shCD105 cells (\*,  $P < 0.05$ , Student's t-test). (B) Cell viability and  $IC_{50}$  values for MTX and FUDR with respect to JEG-3/CD105 OE and JEG-3/shCD105 cells after BMP9 treatment (10 ng/ml; \*,  $P < 0.05$ , Student's t-test).

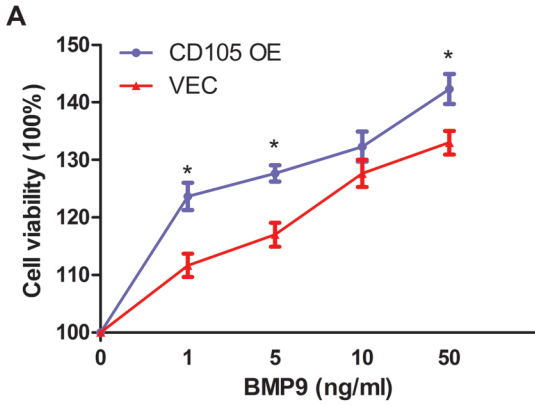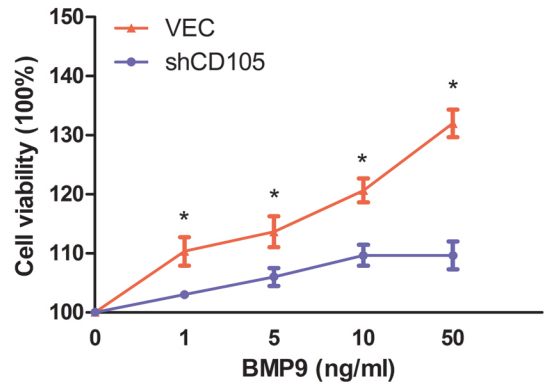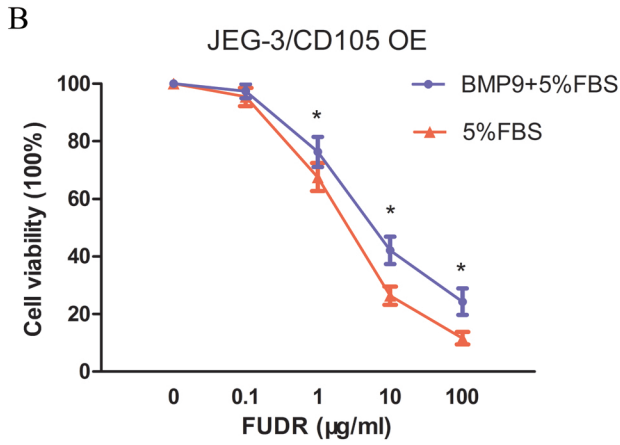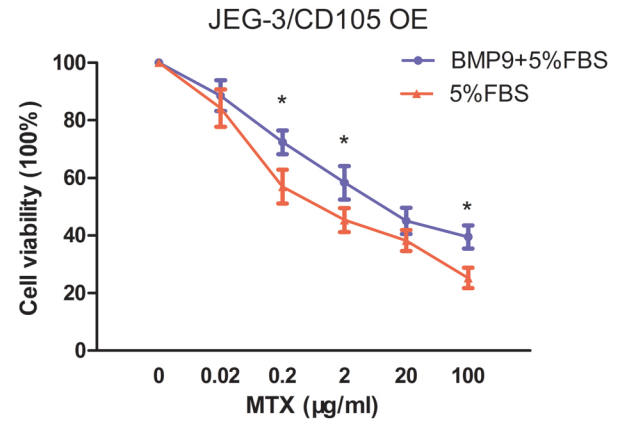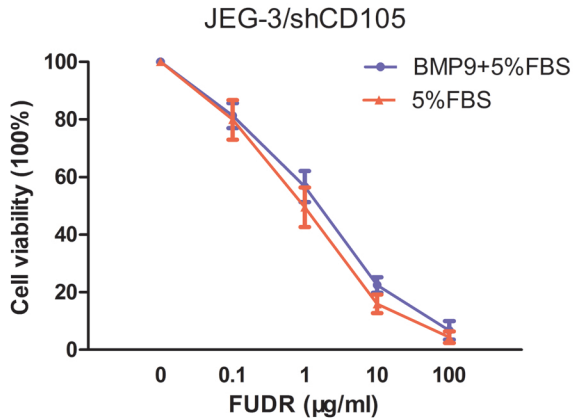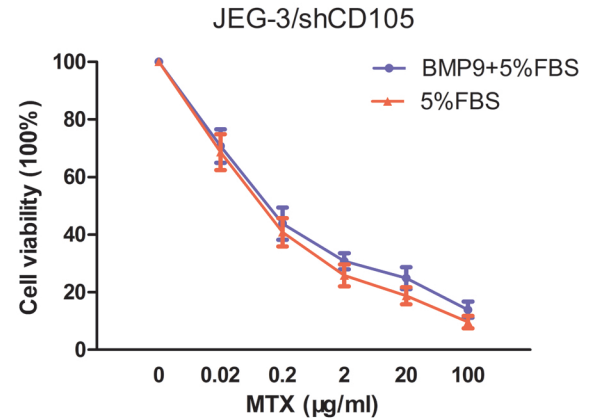

|               |            | CD105 OE |        | shCD105 |       |
|---------------|------------|----------|--------|---------|-------|
|               |            | FUDR     | MTX    | FUDR    | MTX   |
| IC50<br>µg/ml | BMP9+5%FBS | 9.044    | 11.763 | 1.351   | 0.195 |
|               | 5%FBS      | 3.242    | 1.793  | 0.883   | 0.122 |
